# Supplementary material
Source: PubMed Central journal article supplement (PMC2899874)
Supplement: tpc.110.074955_1.pdf [file tpc.110.074955_1.pdf]

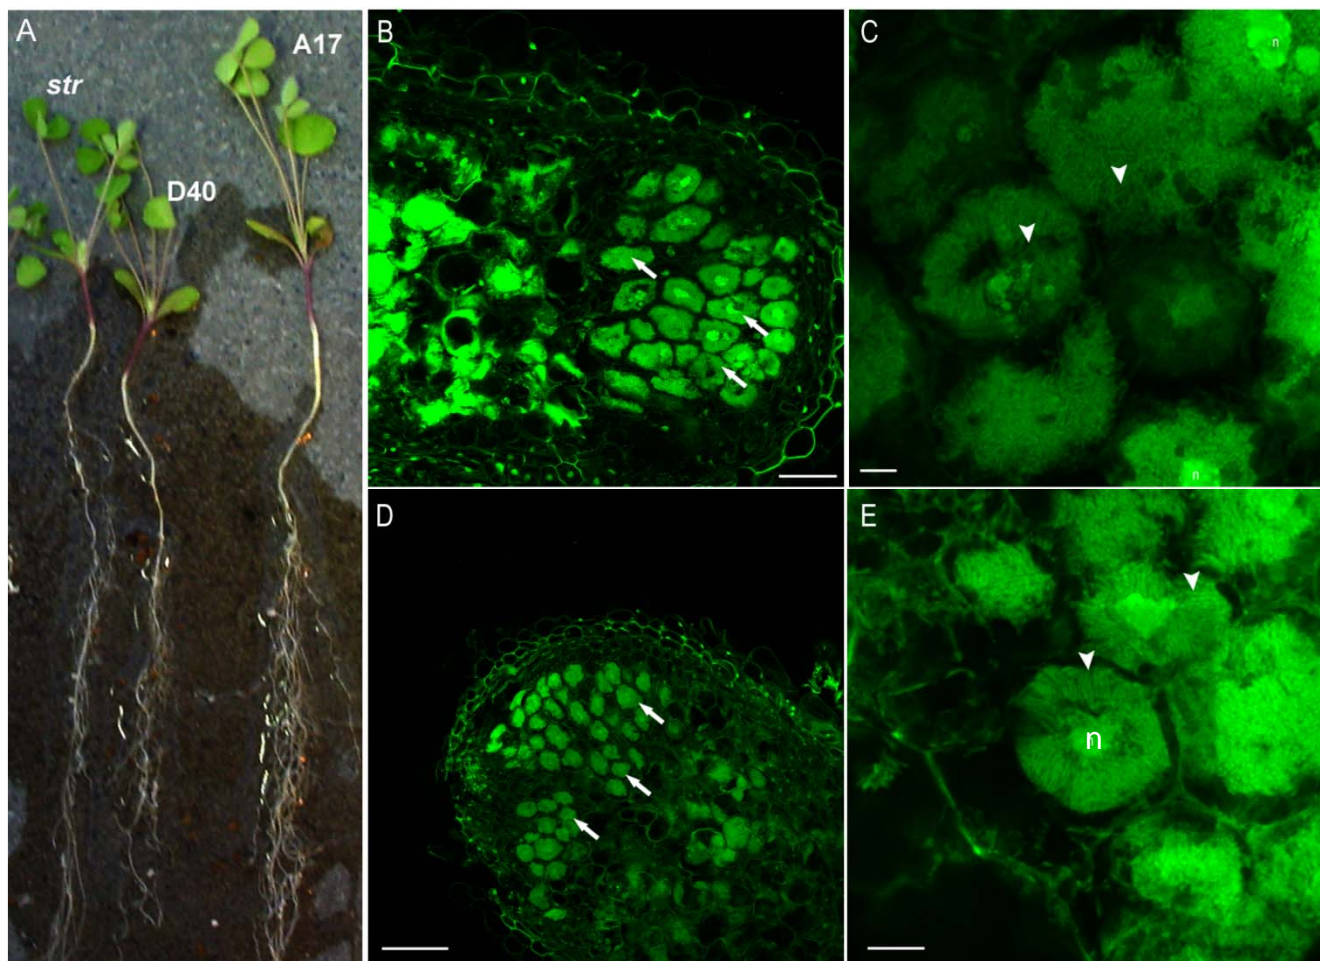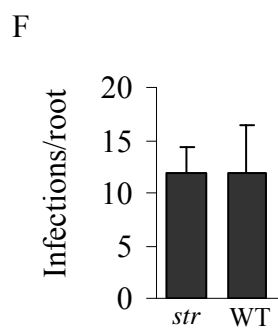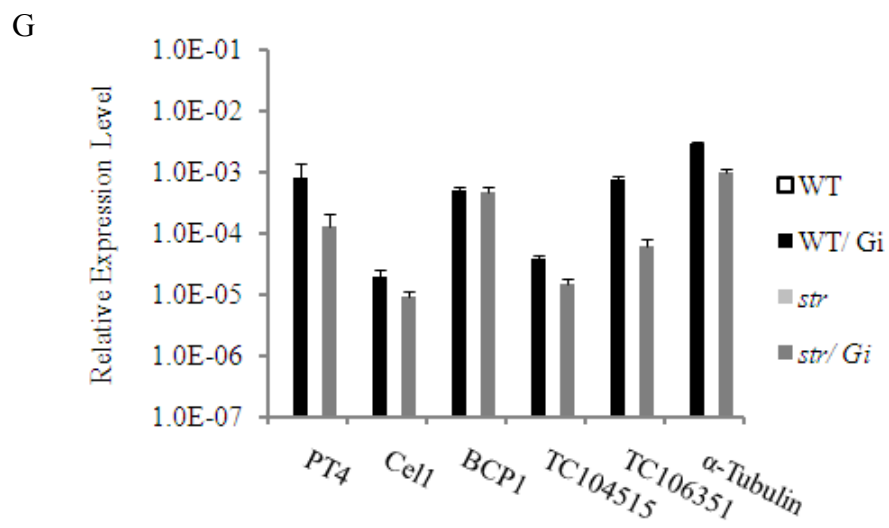

Supplemental Figure 1. Symbiotic phenotypes of *str* and A17

(A-E) Nodulation phenotypes (F-G) mycorrhizal phenotypes

(A) *str* (left), D40 (middle) and wild type (right) plants at 21 dpi with *S. meliloti*. Nodule numbers did not differ between *str* and wild type (data shown in Table 1). Note that the plants were grown for 21 days in the absence of any added nitrogen and the shoots of both *str* and A17 are equivalently green suggesting that in both lines nitrogen-fixation is occurring. D40 is an AM symbiosis mutant (M.J. Harrison, unpublished) which was included in the experiment and could not be readily removed from this image.

(B -E) Longitudinal sections through nodules from wild type roots (B and C) and *str* roots (D and E) stained with SYTO 13. (B and D) Arrows point to cells within the nodule harboring *S. meliloti* bacteroids. (C and E) Higher magnification images show that the bacteroids (indicated by arrowheads) have elongated rod shapes that are typical of the terminally differentiated bacteroids found in *M. truncatula* /*S. meliloti* nodules. Bacteroids in wild type (C) and *str* (E) did not differ in appearance. Bars equal 50  $\mu\text{m}$  (B and D) and 10  $\mu\text{m}$  (C and E). Plant cell nucleus, n.

(F) The average number of fungal infection events per root in *str* and in wild type (WT) 14 days post-inoculation with *Gigaspora gigantea*. Data shown are the average of 10 root systems per line each inoculated with 4 *Gigaspora gigantea* spores. For this experiment, the number of spores was reduced to a minimum to enhance the possibility of revealing a difference in the early phase of the symbiosis. There is no significant difference between the number of infection events in wild type (WT) and *str*.

(G) Quantitative RT-PCR analysis of mycorrhiza-induced genes in *M. truncatula* wild type and *str* roots colonized with *G. intraradices*. Genes analyzed are molecular markers of arbuscule development and AM symbiosis (*PT4*, *Cell*, *BCP1*, Cysteine-rich anti-fungal protein (TC104515),  $\alpha$ -amylase/subtilisin inhibitor (TC106351)(Harrison et al., 2002; Hohnjec et al., 2005; Liu et al., 2007).  $\alpha$ -tubulin is a *G. intraradices* gene. The RNA samples are from wild-type mock-inoculated roots (WT), wild-type roots colonized by *G. intraradices* (WT/Gi), *str* mock-inoculated roots (*str*); *str* roots colonized by *G. intraradices* (*str*/Gi). Data shown are from three biological replicates. Roots were harvested at 7 days after contact with *G. intraradices* spores. The values represent transcript levels of each gene expressed relative to the transcript levels of *M. truncatula* EF-1 $\alpha$ . Error bars represent standard deviation (n=3 independent biological replicates).

Note that these genes are all expressed only in mycorrhizal roots so there are no values for wild type and *str* mock-inoculated control roots (white bars and light grey bars).

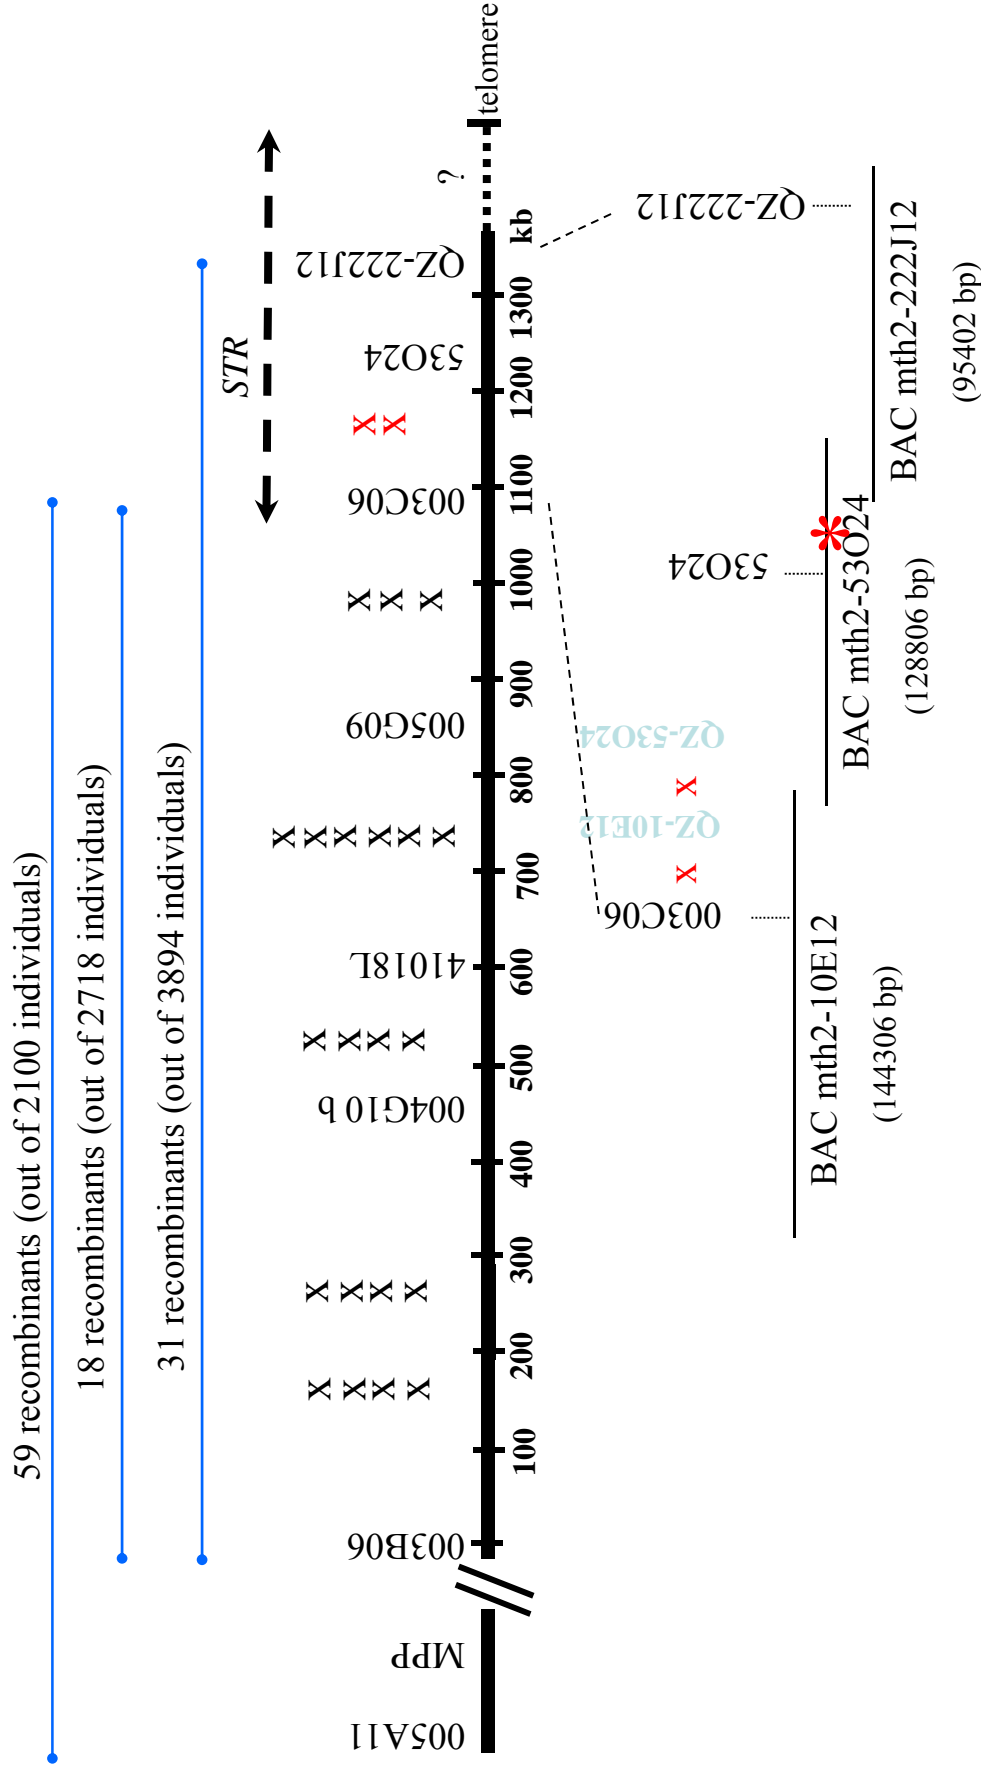

Supplemental Figure 2. Diagram to illustrate mapping of *STR* on chromosome 4

The number of recombinants found within a given region (indicated by the blue lines) is shown at the top of the diagram. A detailed location of the recombination events is shown only for a selection of the recombinants (indicated by X). Recombinants indicated by a red X were further mapped with new markers (shown in green). This placed *STR* in a 230 kb region covered by 3 BACs (mth2-10E12, mth2-53O24 and mth2-222J12). The distance between BAC mth2-222J12 and the telomere is unknown. *STR* is indicated by a red asterisk.

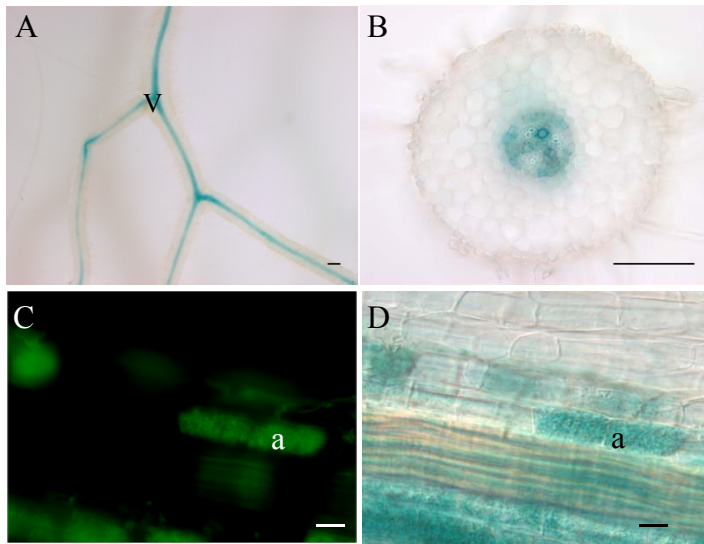

Supplemental Figure 3. Histochemical staining for GUS activity in *M. truncatula* roots expressing a *STR2* promoter–*Uida* fusion construct.

(A) and (B) GUS staining in mock inoculated roots reveal gene expression in the vascular tissue (V). Bars equal 100  $\mu\text{m}$ .

(C) and (D) GUS staining in roots colonized with *Glomus versiforme*. (C) Fluorescent microscopy image and (D) corresponding bright field image showing GUS expression in cortical cells with arbuscules (a). *G. versiforme* is stained with WGA-Alexafluor 488 which fluoresces green. Bars equal 10  $\mu\text{m}$ .

A

```

STR 993 ATAT TGAGTATCTCCTAGATGTTATAACTGAATACGATCAAGCGACGGTT
STR2 1048 CAAT TGAGAATCTCAT TGATGTGATACAAGAGTATGATCAG-----

STR 1043 GGACTTGACCCCTCTTGTCCAATACCAACA TGATGGCCATAAACCTGACCC
STR2 1089 ---TGTGATTTTGTG---GTTGTTGAGGTGCTAGC--TGAGTTTGCACG

STR 1093 AGCAGCCATGA CCCCTGTTCTTA AACCTCCAAGAA CACCTTACAGAAGGA
STR2 1130 TACCGGAATGAAACCACCTCTT-----TTGAGTGA-----TATGGAGGAA

STR 1143 ACACCCCAGCATCTAAA CACATGATTAGCCTGCGCAGCCAAGGATTTACT
STR2 1170 ATAAT-----TCATATAC-TAATTCATTGCAC-----

STR 1193 GCTGGTACCCACAACCTGATTCTTCACAGTTTGGCCTTGATGATGATGA
STR2 1198 -----CTTCAACATCT---CCTTTGCA TAGAGGATCTAAATATGAGGA

STR 1243 CAATGATGATGACGAAAATTTTGATAACTCCCTTGAAGGAGAAGTGTTC
STR2 1238 -----AAAATCTCAAGATTTCTCTT-----ATTTCATC

STR 1293 AAACATCAAGAAACATTGTGACCAGTGGTGTATCCACGTTAGCTTCT
STR2 1265 ACAAATTAGCAGAA-----GGAGTTTGA--ATGATGAGTTTGA

STR 1343 CAGTCTACCAAGATTTCTCAGCCAAAGATTTCTCTGTCTGGCTTTACAA
STR2 1301 TCATAGTATTAGAAGTCCATATAATAACA CACCAATGTC-----A

STR 1393 TGGTGTAGTAGGAA CCCCACGTCGCCACCATCATGGACTCCGGCAAGAA
STR2 1341 TGGAGTGCTAGTAATAGTGCA-----GCTTTCTTGAAATTC----ACAC
    
```

B

```

STR 2293 TGAA TTCAAGAACAATCGCGGCTGCTACTCAGGAAACAAGCAGAT-TTA
STR2 2198 TGAGTATCAGACTAATGAAACTTTGGATCAATGATGGTGTATCTATTA

STR 2342 TC--CCCCGGACCTTTAGGAGATGTTAAGCCCAGCAACACCACAATGCC
STR2 2248 CTGGTTTTGATATTTTGAAGAGTCTTCATATTGGTACTGAAGAGATTA--

STR 2390 AGTCTTCCGCTTA ACTGCTTATTAGGGGAAGATGCTCTGTGCC-ACAATGG
STR2 2296 AGAAAAGGAACAATGTGCTTATAATGTTAGGTTGGGCTGTTCTATATAGG

STR 2439 ATATTACAATGGAAAGTCTATGGTATGACATCTTAATCCTGCTAGCTTGG
STR2 2346 ATTTTATTTTACATTATCTTTCGTTTTCATCAAAA-----AATCAA

STR 2489 GGTGTTCTTTACAGGTTCTTCTTCTACTTGGTTTGTAGATTCTACTCCAA
STR2 2389 GGT-CCTAGTAGAGGAAAATGTGTGATAAAGTTAACAATTAAATTTCTT

STR 2539 AAATGAAA-GAAAATGAATAATTACCACCCCAA TTTCTTGGATAACC
STR2 2438 TTGTATAATGCAAACATATTGTTTG--GATATTGTTGCTTC----AATG

STR 2588 TATTACTTAAA TAGCCAAGGCCACAGTGA TCACAT TATTTCTTGTATTAT
STR2 2482 TATTG--TATT TGAACAAGGTT--TATAAATTGAGTGATCATTGTATTGT
    
```

Supplemental Figure 4. Alignment of *STR* and *STR2* nucleotide sequences in the regions targeted for RNA interference.

(A) Alignment of sequences for *STR2* RNAi-1.

(B) Alignment of sequences for *STR2* RNAi-2.

No significant DNA sequence similarity between these two genes and no regions of identity greater than 7 nucleotides. The regions from *STR2* corresponding to the RNAi constructs are underlined.

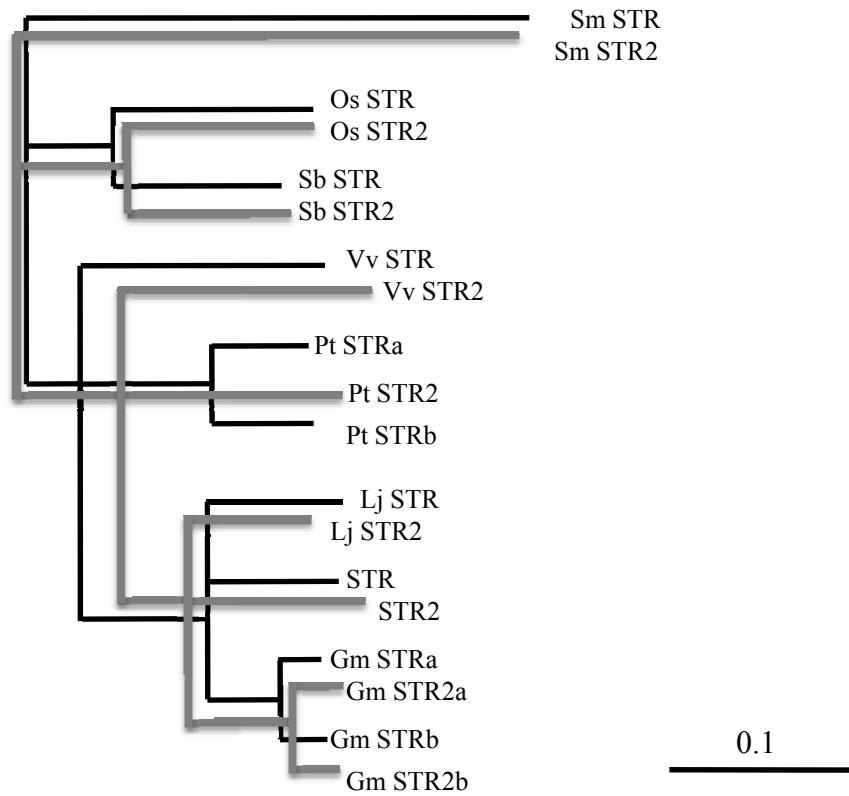

Supplemental Figure 5. Phylogenetic trees of STR and STR2 orthologs. Phylogenetic trees of STR (black lines) and STR2 (grey shaded lines) orthologs were constructed separately as described in materials and methods. Gm (*Glycine max*), Sb (*Sorghum bicolor*), Os (*Oryzae sativa*), Pt (*Populus trichocarpa*), Vv (*Vitis vinifera*), Lj (*Lotus japonicus*), Sm (*Selaginella moellendorffii*). SmSTR and SmSTR2 were used as outgroups, respectively. Branches with a bootstrap value lower than 980 were collapsed. Scale bar represents 0.1 amino acid substitutions per site. Accession numbers for these sequences are shown in Supplemental Table 4.

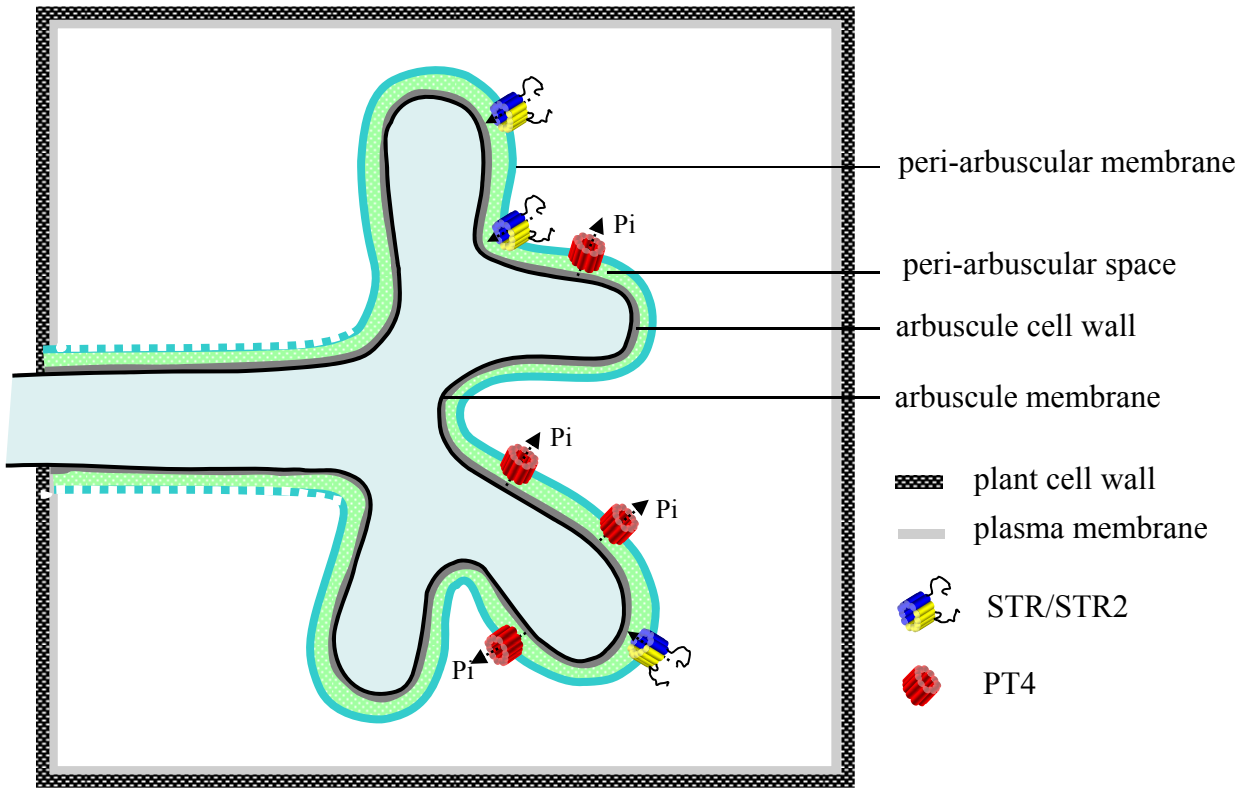

Supplemental Figure 6. Diagram illustrating the location of STR/STR2 on the peri-arbuscular membrane in a cortical cell containing an arbuscule. STR/STR2 transports an unknown molecule(s) into the peri-arbuscular space. PT4, a mycorrhizal specific phosphate transporter is located on the same membrane as STR/STR2.

**Supplemental References:**

**Harrison, M.J., Dewbre, G.R., and Liu, J.** (2002). A phosphate transporter from *Medicago truncatula* involved in the acquisition of phosphate released by arbuscular mycorrhizal fungi. *Plant Cell* **14**, 2413-2429.

**Hohnjec, N., Vieweg, M.F., Pühler, A., Becker, A., and Küster, H.** (2005). Overlaps in the transcriptional profiles of *Medicago truncatula* roots inoculated with two different Glomus fungi provide insights into the genetic program activated during arbuscular mycorrhiza. *Plant Physiol.* **137**, 1283-1301.

**Liu, J., Maldonado-Mendoza, I.E., Lopez-Meyer, M., Cheung, F., Town, C.D., and Harrison M, J.** (2007). The arbuscular mycorrhizal symbiosis is accompanied by local and systemic alterations in gene expression and an increase in disease resistance in the shoots. *The Plant Journal* **50**, 529-544.



## Supplemental Tables

**Supplemental Table 1.** *str* is linked to 4 markers at the on chromosome 4

|                         |        |        |        |        |        |        |       |        |        |        |
|-------------------------|--------|--------|--------|--------|--------|--------|-------|--------|--------|--------|
| Markers on Chromosome 4 | 002B07 | 002D07 | 003F10 | 005D04 | 004H02 | 005A11 | MPP   | 005H08 | 41018L | 005G09 |
| Genetic location (CM)   | 7.4    | 11.8   | 41.4   | 48.1   | 51.8   | 59.2   | 61.8* | 61.1   | 61.8   | 61.1*  |
| Recombinants (1)        | 16/19  | 17/19  | 6/18   | 5/18   | 5/18   | 1/24   | 0/24  | 0/24   | 0/24   | 0/24   |

Initial mapping was carried out on a population of 122 F2 individuals containing 24 plants homozygous for the *str* allele.

\* marker position relocated based on our mapping data.

(1) The proportion of plants showing recombination between the marker and *str*

**Supplemental Table 2.** Sequence confirmation that a wild type *STR* transgene is expressed in the complemented *str* roots

| Constructs transformed in <i>str</i> | Number of plants with transgenic roots | Number of plants showing wild type phenotype | Wild type <i>STR</i> allele detected by sequencing cDNA |
|--------------------------------------|----------------------------------------|----------------------------------------------|---------------------------------------------------------|
| <i>STR</i> in pCambia2301            | 23                                     | 23                                           | 15/15                                                   |
| pCambia2301                          | 11                                     | 0                                            | 0/8                                                     |

| <b>Supplemental Table 3. Primer sequences</b> |                                                        |                                                       |                                                           |
|-----------------------------------------------|--------------------------------------------------------|-------------------------------------------------------|-----------------------------------------------------------|
| <b>Primer set</b>                             | <b>Forward primer sequence 5' - 3'</b>                 | <b>Reverse primer sequence 5' - 3'</b>                | <b>PCR purpose</b>                                        |
| QZ-10E12                                      | GTGAAGACTTTGCGGTGGAT                                   | AAGCATCTGAACGGTGAAGG                                  | SSR marker at the end of chromosome 4                     |
| QZ-53O24                                      | GGTGTCTTTGGCTTAGTCTGTAAC                               | CTTCTTCAAACATCCGGCTC                                  | SSR marker at the end of chromosome 4                     |
| QZ-222J12                                     | ATCAGGGCCTATGTGGTTGTGGTA                               | GAAACCCATGCAATGCCTAGGGAAA                             | SSR marker at the end of chromosome 4                     |
| 7D10                                          | TCGCAATAATCGGAATGTGA                                   | CCTGGGGATGGAAAGAAAAG                                  | PCR product labeled for BAC library screen                |
| STR                                           | ATGAAGAAGCACGGTAAGCATTG                                | ACTTCACACTCACCTTTCGGG                                 | Expression of <i>STR</i>                                  |
| STR2                                          | CCTGTTAGTTTCACTGGAGGACTTG                              | GCCCTAATCTGAAATCAGCAGCA                               | Expression of <i>STR2</i>                                 |
| ABCG10-Q                                      | CATCTTGTGGAAGCTACCGC                                   | GCAGTGAAGTTTGTGTTGAGACC                               | Real time QPCR for Mt ABCG10                              |
| ABCG13-Q                                      | AATGTGAGTTTCCAAGCCAGAC                                 | GGATCGTGGATGATGTCTGTG                                 | Real time QPCR for Mt ABCG13                              |
| STR-pro                                       | GAGTAAGCTTTGCGTAGTAGAGCAATCACTTCTTATG                  | GAGTTCTAGACTTTGATTTATATCCCCGTAGTGGTTGT                | <i>STR</i> promoter GUS fusion construct                  |
| STR2-pro                                      | GAGATCTAGAGTAGTGCATAAGATGAAACACTGGACA                  | TGTGAAGCTTTTTCTTGAGGTGCAAGTTAAGTTTTG                  | <i>STR2</i> promoter GUS fusion construct                 |
| STR2-RNAi1                                    | GGGACAAGTTTGTACAAAAAAGCAGGCTGTGATACAAGAGTATGATCAGTGTGA | GGGACCACTTTGTACAAGAAAGCTGGTTCCTACTATTACTAGCACTCCATGAC | <i>STR2</i> RNAi-1 construct                              |
| STR2-RNAi2                                    | GGGACAAGTTTGTACAAAAAAGCAGGCTCTTTTGGATCAAATGATGGGTGATCT | GGGACCACTTTGTACAAGAAAGCTGGTTCCTTGTCAAATACAATACATTGAGC | <i>STR2</i> RNAi-2 construct                              |
| STR2-Q                                        | GCAAGTGGGAGTCTTAAAGGA                                  | GCCCTAATCTGAAATCAGCAG                                 | <i>STR2</i> real time QPCR for <i>STR2</i> RNAi materials |
| STR-Q                                         | TTCCAATGATGCAGTCCCA                                    | TGGTTATGACTGCAAATGTGAG                                | <i>STR</i> real time QPCR for <i>STR2</i> RNAi materials  |
| Cell                                          | GGTGAAATTGTGGCAGCACT                                   | TCAACAGCGGTGTAGGTTCC                                  | Real time QPCR for core Mt mycorrhizal gene expression    |
| PT4                                           | GGATTCTTTTGCACGTTCTTGG                                 | CCTGTCATTTGGTGTTGCAGTG                                | Real time QPCR for core Mt mycorrhizal gene expression    |

|                   |                                 |                         |                                                        |
|-------------------|---------------------------------|-------------------------|--------------------------------------------------------|
| $\alpha$ -Tubulin | TGTCCAACCGGTTTTAAAGT            | AAAGCACGTTTGGCGTACAT    | Real time QPCR for core Mt mycorrhizal gene expression |
| BCP1              | AAGGTTGTCACCAACACGAA            | TGCAATCTACCTTGCCATTT    | Real time QPCR for core Mt mycorrhizal gene expression |
| TC104515          | TGCCTCGTCTTTCACCTTATTT          | CCTCTCTTTCTCTGCATTGGTC  | Real time QPCR for core Mt mycorrhizal gene expression |
| TC100720          | TACTTTTTCTGTATCCATATTTTGTT<br>G | TGAAAAGAAACAGAAATCCCAGA | Real time QPCR for core Mt mycorrhizal gene expression |
| EF-1 $\alpha$     | TGACAGGCGATCTGGTAAGG            | TCAGCGAAGGTCTCAACCAC    | Real time QPCR for core Mt mycorrhizal gene expression |
| TC106351          | TCAAATTCACACCATTTGCTC           | CCTTCTTCCACTCTTGGTGTC   | Real time QPCR for core Mt mycorrhizal gene expression |

### 1. SSR and CAPs markers

All SSR markers were amplified with the following PCR conditions: 94°C for 4 min, followed by 38 cycles at 94°C for 30 s, 55°C for 40 s, and 72°C for 40 s, followed by 72°C for 10 min. Reactions were performed in 10  $\mu$ l volume containing 1  $\mu$ l of genomic DNA, 1.5 mM MgCl<sub>2</sub>, 500  $\mu$ M dNTP, 1 U of Taq polymerase, and 500  $\mu$ M of each primer. PCR products were run on a 3% agarose gel (1X TAE buffer) and stained with ethidium bromide. For CAPS markers, PCR products were digested with the appropriate restriction enzymes for 1 hour.

### 2. RT-PCR and Q RT-PCR

Real time PCR analysis was carried out essentially as described by Liu et al., (2007) with the following modifications. Primers were designed using an online real-time PCR primer design tool (<http://www.idtdna.com/Scitools/Applications/RealTimePCR/>). PCR reactions were carried out in a total volume of 10  $\mu$ l which contained 5  $\mu$ l 2x SYBR Green PCR master mix, 150 nM of each primer, and 20 ng of cDNA template. The PCR program was as follows: 95°C for 5 min, 40 cycles of 95°C for 30 sec, 56°C for 30 sec and 72°C for 30 sec. Dissociation curve analysis was performed, with the thermal cycle of 95°C for 15 sec, 60°C for 15 sec and 95°C for 15 sec, to exclude non-specific reactions. The data were analyzed with Applied Biosystems SDS 2.2 software. The *M. truncatula* elongation factor 1-alpha (EF-1 $\alpha$ ) gene was included to enable normalization of expression levels of all genes assayed.

### 3. 7D10 primers

Using a set of 7D10 primers (supplemental table 3), a DNA fragment corresponding to the BAC end sequence of mth2-7D10, was amplified with the following program: 95°C for 3 min, 30 cycles of 95°C for 30 sec, 55°C for 30 sec and 72°C for 30 sec.

**Supplemental Table 4.** Accession numbers of genes shown in Figure 4A.

| <b>Protein ID</b> | <b>Accession number</b> | <b>Gene Locus</b> |
|-------------------|-------------------------|-------------------|
| AtABCG1           | O80946                  | At2g39350         |
| AtABCG2           | Q9ZUT0                  | At2g37360         |
| AtABCG3           | Q9ZUU9                  | At2g28070         |
| AtABCG4           | Q9SW08                  | At4g25750         |
| AtABCG5           | Q9SIT6                  | At2g13610         |
| AtABCG6           | Q9FNB5                  | At5g13580         |
| AtABCG7           | Q9ZU35                  | At2g01320         |
| AtABCG8           | Q9FLX5                  | At5g52860         |
| AtABCG9           | Q9SZR9                  | At4g27420         |
| AtABCG10          | Q9MAH4                  | At1g53270         |
| AtABCG11          | Q8RXN0                  | At1g17840         |
| AtABCG12          | Q9C8K2                  | At1g51500         |
| AtABCG13          | Q9C8J8                  | At1g51460         |
| AtABCG14          | Q9C6W5                  | At1g31770         |
| AtABCG15          | Q8RWI9                  | At3g21090         |
| AtABCG16          | Q9M2V7                  | At3g55090         |
| AtABCG17          | Q9M2V6                  | At3g55100         |
| AtABCG18          | Q9M2V5                  | At3g55110         |
| AtABCG19          | Q9M3D6                  | At3g55130         |
| AtABCG20          | Q9LFG8                  | At3g53510         |
| AtABCG21          | Q7XA72                  | At3g25620         |
| AtABCG22          | NP_188746               | At3g21090         |
| AtABCG23          | Q93YS4                  | At5g06530         |
| AtABCG24          | Q3E9B8                  | At5g19410         |
| AtABCG25          | Q9MAG3                  | At1g53390         |
| AtABCG26          | Q84TH5                  | At1g71960         |
| AtABCG27          | Q9LK50                  | At3g13220         |
| AtABCG28          | Q9FT51                  | At3g52310         |
| AtABCG29          | Q9FF46                  | At5g60740         |
| STR               | ACV73541                | mth2-53O24        |
| STR2              | ACV73543                | mth2-20E3         |
| MtABCG3           | AC146751*               | mth2-60a22        |
| MtABCG4           | AC175537*               | mth2-39i6         |
| MtABCG5           | AC174344*               | mth2-167B8-1      |
| MtABCG6           | AC174344*               | mth2-167B8-2      |
| MtABCG7           | AC174344*               | mth2-167B8-3      |
| MtABCG8           | AC174344*               | mth2-167B8-4      |
| MtABCG9           | AC174344*               | mth2-167B8-5      |
| MtABCG10          | AC122164*               | mth2-24H4         |
| MtABCG11          | AC146331*               | mth2-7H18         |
| MtABCG12          | CT573506*               | mth4-42D11        |
| MtABCG13          | AC186136*               | mth2-5A14         |

|                   |                         |                              |
|-------------------|-------------------------|------------------------------|
| MtABCG14          | AC138131*               | mth2-21H11                   |
| MtABCG15          | AC148655*               | mth2-61C11                   |
| <b>Protein ID</b> | <b>Accession number</b> | <b>Gene Locus</b>            |
| MtABCG16          | CU012051*               | mth2-60M24                   |
| GmSTRa            | ACUP01004567*           | GLYMAchr_08_Cont4567         |
| GmSTRb            | ACUP01003232*           | GLYMAchr_05_Cont3232         |
| SbSTR             | XP_002445326            | SORBIDRAFT_07g009430         |
| PtSTRa            | XP_002318509            | POPTRDRAFT_569718            |
| PtSTRb            | XP_002321525            | POPTRDRAFT_807932            |
| SmSTR             |                         | scaffold_146:124474..126912  |
| VvSTR             | XP_002278856            | LOC100266434                 |
| OsSTR             | NP_001063119            | Os09g0401100                 |
| LjSTR             | AP010316*               | LjT49M15                     |
| SbSTR2            | XP_002458373            | SORBIDRAFT_03g032350         |
| OsSTR2            | BAD30878                | OSJNBa0049I08                |
| PtSTR2            | XP_002310338            | POPTRDRAFT_764936            |
| SmSTR2            |                         | scaffold_11:1791209..1793756 |
| GmSTR2a           | ACUP01000026*           | GLYMAchr_01_Cont26           |
| GmSTR2b           | ACUP01005538*           | GLYMAchr_09_Cont5538         |
| VvSTR2            | XP_002272098            | LOC100258701                 |
| LjSTR2            | AP004579*               | LjT11E23                     |

\*Gene has not been annotated. The accession number represents the BAC or contig where the gene is located.
